# Supplementary material for: Prospectively defined murine mesenchymal stem cells inhibit Klebsiella pneumoniae-induced acute lung injury and improve pneumonia survival
Source: Springer Nature journal article supplement (doi:10.1186/s12931-015-0288-1), 2015-10-05

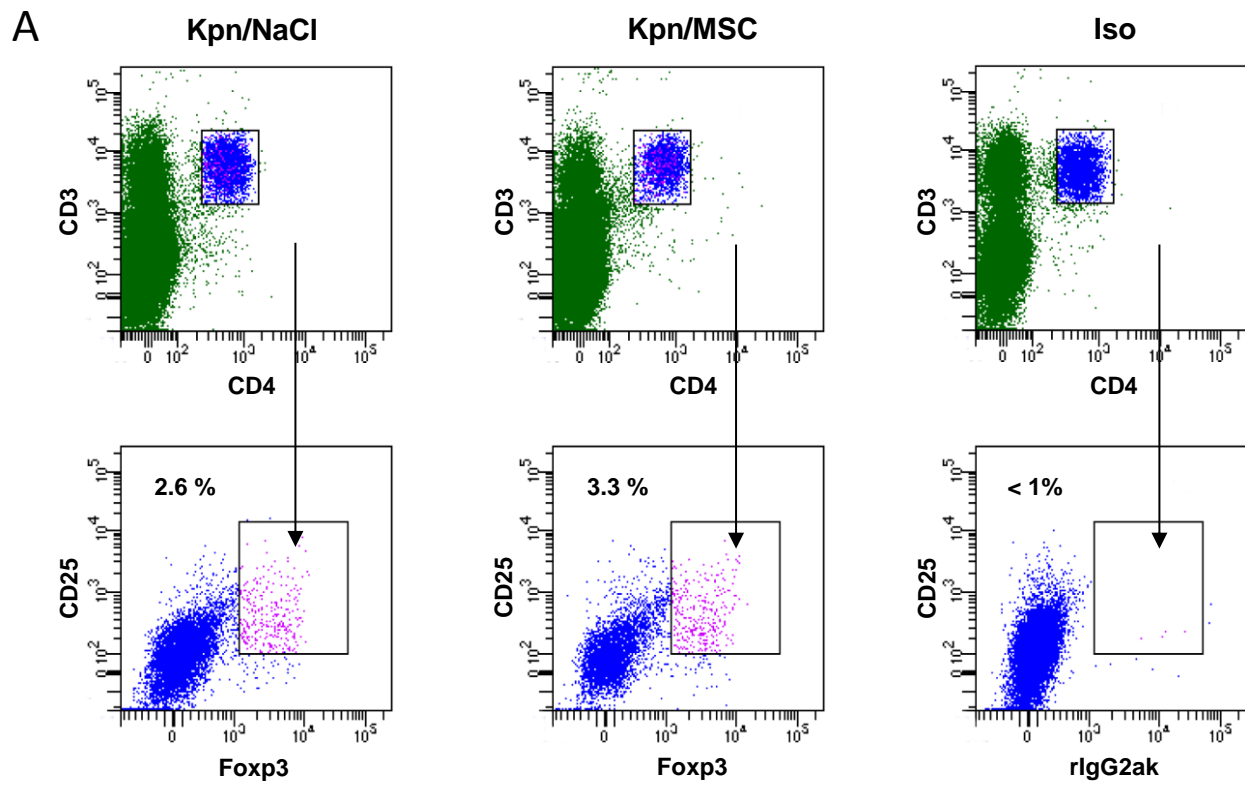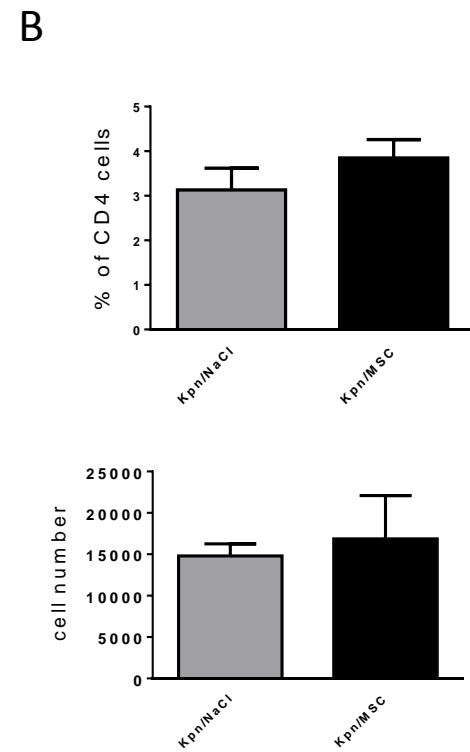

Supplement: MOESM2 [file 9759816]
